# Supplementary material
Source: PubMed Central journal article supplement (PMC2783229)

### Supplemental Figure Legends

**SFig. 1. *mdm10*Δ cells exhibit a delay in progression from G<sub>1</sub> to G<sub>2</sub>.** Wild-type (ISY001), *mdm10*Δ (ISY002) or rho<sup>0</sup> (ISY001-rho<sup>0</sup>) yeast were grown in SC medium at 30°C to mid-log phase (OD<sub>600</sub> = 0.5 – 0.8). Cells were incubated with α-factor (10 μM) for 2.5 hrs to induce arrest in G<sub>1</sub> phase. Thereafter, they were washed with pheromone-free SC medium and incubated at 30°C. At various times min after release from pheromone-induced G<sub>1</sub> arrest, cells were fixed, stained with propidium iodide and analyzed for DNA content by flow cytometry. The percentage of total dividing cells in G<sub>2</sub> phase, as a function of time after release from pheromone-induced G<sub>1</sub> arrest, is shown. The basis for the reduced rate of progression of *mdm10*Δ cells from G<sub>1</sub> to G<sub>2</sub> is not clear. However, rho<sup>0</sup> cells, which have no mtDNA and severe defects in mitochondrial respiratory activity, progress from G<sub>1</sub> to G<sub>2</sub> phase at rates similar to that of wild-type cells. Thus, the reduced rate of cell cycle progression observed in *mdm10*Δ cells does not appear to be linked to mitochondrial respiration or dependent upon mtDNA.

**SFig. 2. *mdm10*Δ cells exhibit a delay anaphase entry and mitotic exit.** A) A wild-type strain (BY4741) and an *mdm10*Δ mutant strain (ISY002) were synchronized as for Fig. S1 and grown at 30°C. Aliquots were removed from cultures at the time indicated. Levels of Clb2p in synchronized cell cultures were determined by Western blot analysis using a polyclonal anti-Clb2p antibody. Hxk1p was used as a loading control. B) Wild-type (LGY020; black line) and *mdm10*Δ (LGY021; grey line) cells expressing plasmid-borne mCherry-tagged tubulin were synchronized and aliquots were removed from cultures at the times indicated, fixed and visualized by fluorescence microscopy. The number of cells with spindles > 4 μm in length was determined as a function of time after release from pheromone-induced G<sub>1</sub> arrest. Spindle assembly and disassembly are also delayed in *mdm10*Δ compared to wild type cells. We detect the maximum number of anaphase spindles, spindles that are 4-7 μm in length, within 60 min after release of wild-type cells from pheromone-induced G<sub>1</sub> arrest, and spindle disassembly 100 min after release from G<sub>1</sub> arrest. The kinetics of anaphase spindle assembly and disassembly in these synchronized wild-type cells are similar to those reported previously [7]. In contrast, deletion of *MDM10* results in a 25 min delay in spindle assembly and a 35 min delay in spindle disassembly. Accounting for the delay in anaphase onset, *mdm10*Δ cells exhibit a 10 min delay in mitotic exit. The delay in early anaphase and mitotic exit observed in *mdm10*Δ is similar to the delay in G<sub>1</sub> to G<sub>2</sub> phase progression. C) Quantitation of the timecourse for formation of second buds in multibudded *mdm10*Δ cells.

**SFig. 3. *mdm10*Δ cells do not exhibit defects in septation.** A) *cbk1*Δ and *mdm10*Δ cells (ISY007 and ISY002) were grown to mid-log phase, fixed and incubated with zymolyase. Phase contrast images of *cbk1*Δ and *mdm10*Δ cells before and after cell wall digestion are shown. B) The number of multibudded cells in *cbk1*Δ and *mdm10*Δ cells before and after treatment with zymolyase. Error bars show standard deviations from *n*>800 measurements. Cell wall digestion dissociates multibudded cells with failed septum degradation (e.g. *cbk1*Δ cells) but has only a limited effect on multibudded cells produced by contractile ring defects. In contrast, similar treatment produced only a slight decrease in the number of cells in multibudded clumps of *mdm10*Δ cells. Thus, the multibudded phenotype in *mdm10*Δ cells is not due to a septation defect.

**SFig. 4. Deletion of *MDM10* has no effect on spindle alignment or nucleolar segregation.**

**A)** Spindle and DNA were visualized in wild-type (BY4741) and *mdm10* $\Delta$  (Open Biosystems 398) by indirect immunofluorescence using antibodies that recognize tubulin and DAPI staining. Alignment of spindles  $\geq 4 \mu\text{m}$  was assessed in wild-type cells 60 min after release from pheromone induced G1 arrest, and in *mdm10* $\Delta$  cells 120 min after release from G1 arrest. Spindles were scored as aligned if they were parallel to the mother-bud axis and any detectable bend in the spindle was  $<30^\circ$  from mother-bud axis. In wild-type and *mdm10* $\Delta$  cells, 69.2% and 76.5% of the spindles examined exhibited proper alignment and orientation ( $n>100$ ). **B)** For analysis of segregation of nucleolar material, mid-log phase wild-type cells (BY4741) and *mdm10* $\Delta$  cells (Open Biosystems 398) were fixed and stained for Nop1p, a nucleolar protein, by indirect immunofluorescence, and for DNA using DAPI. Analysis was restricted to cells in which DAPI-stained nuclear DNA masses were fully separated. DNA masses and Nop1p-stained nucleolus were fully separated in 96% of wild-type cells analyzed, and in 100% of *mdm10* $\Delta$  cells examined ( $n>50$ ). Cell outlines are shown in white. Bar: 1  $\mu\text{m}$ .

**Fig. S5. Sli15p exhibits normal localization to the spindle apparatus in *mdm10* $\Delta$  cells.** **A)** Wild-type (LGY022) and *mdm10* $\Delta$  (LGY023) Sli15p-GFP (green) and mCherry-tagged tubulin (red) were grown to mid-log phase, and fixed as for Fig. 1, in wild-type (top) and *mdm10* $\Delta$  (lower) cells. The images shown are 2-D projections from reconstructed 3-D volumes. Cell outlines are shown in white. Bar, 1  $\mu\text{m}$ . **B).** Quantitation of Sli15p localization as a function of spindle length in wild-type and *mdm10* $\Delta$  cells. Error bars show standard error of the mean ( $n>200$ ).

**SFig. 6: Hyperactivation of the MEN suppresses the delay in mitotic exit observed in *mdm10* $\Delta$  cells.** Wild-type (ISY001), *mdm10* $\Delta$  (ISY002) and *mdm10* $\Delta$  *bub2* $\Delta$  (ISY029) cells were synchronized with pheromone as for Fig. 2. Aliquots were removed from cultures at the times indicated and levels of Clb2p were determined by Western blot analysis using a polyclonal anti-Clb2p antibody. Hxk1p was used as a loading control. Hyperactivation of the MEN in *mdm10* $\Delta$  cells by-passes the subtle delay in mitotic cyclin degradation.

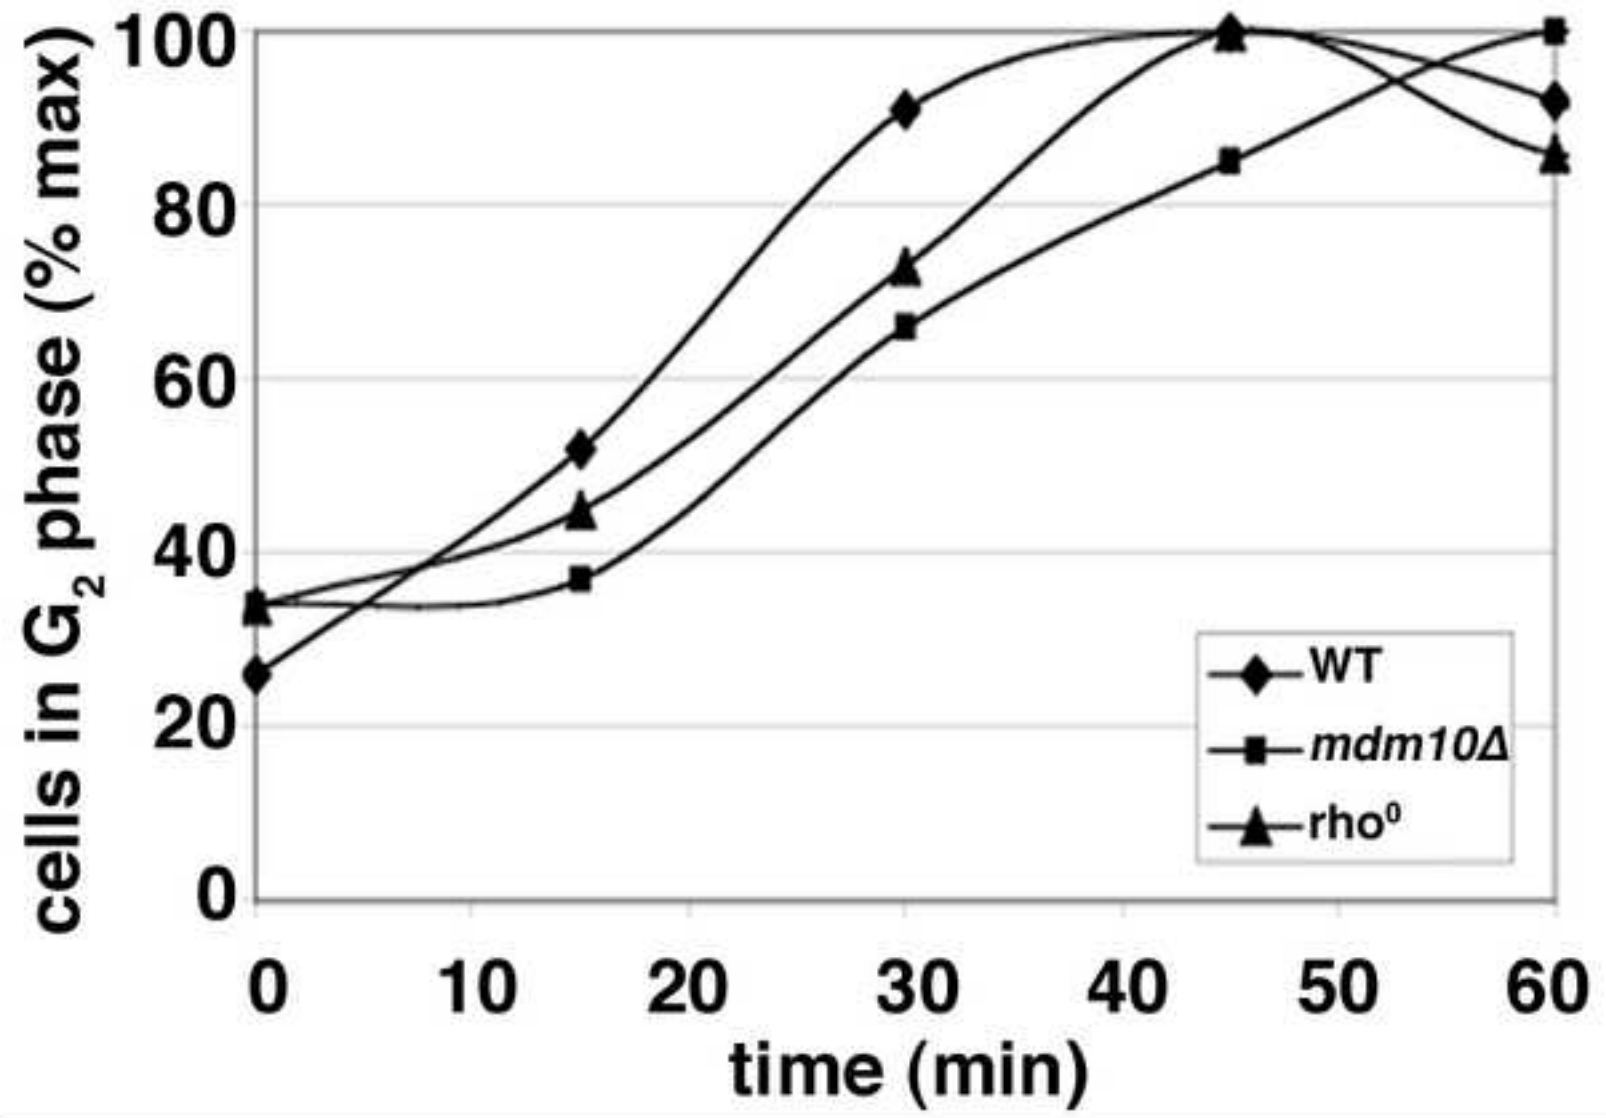

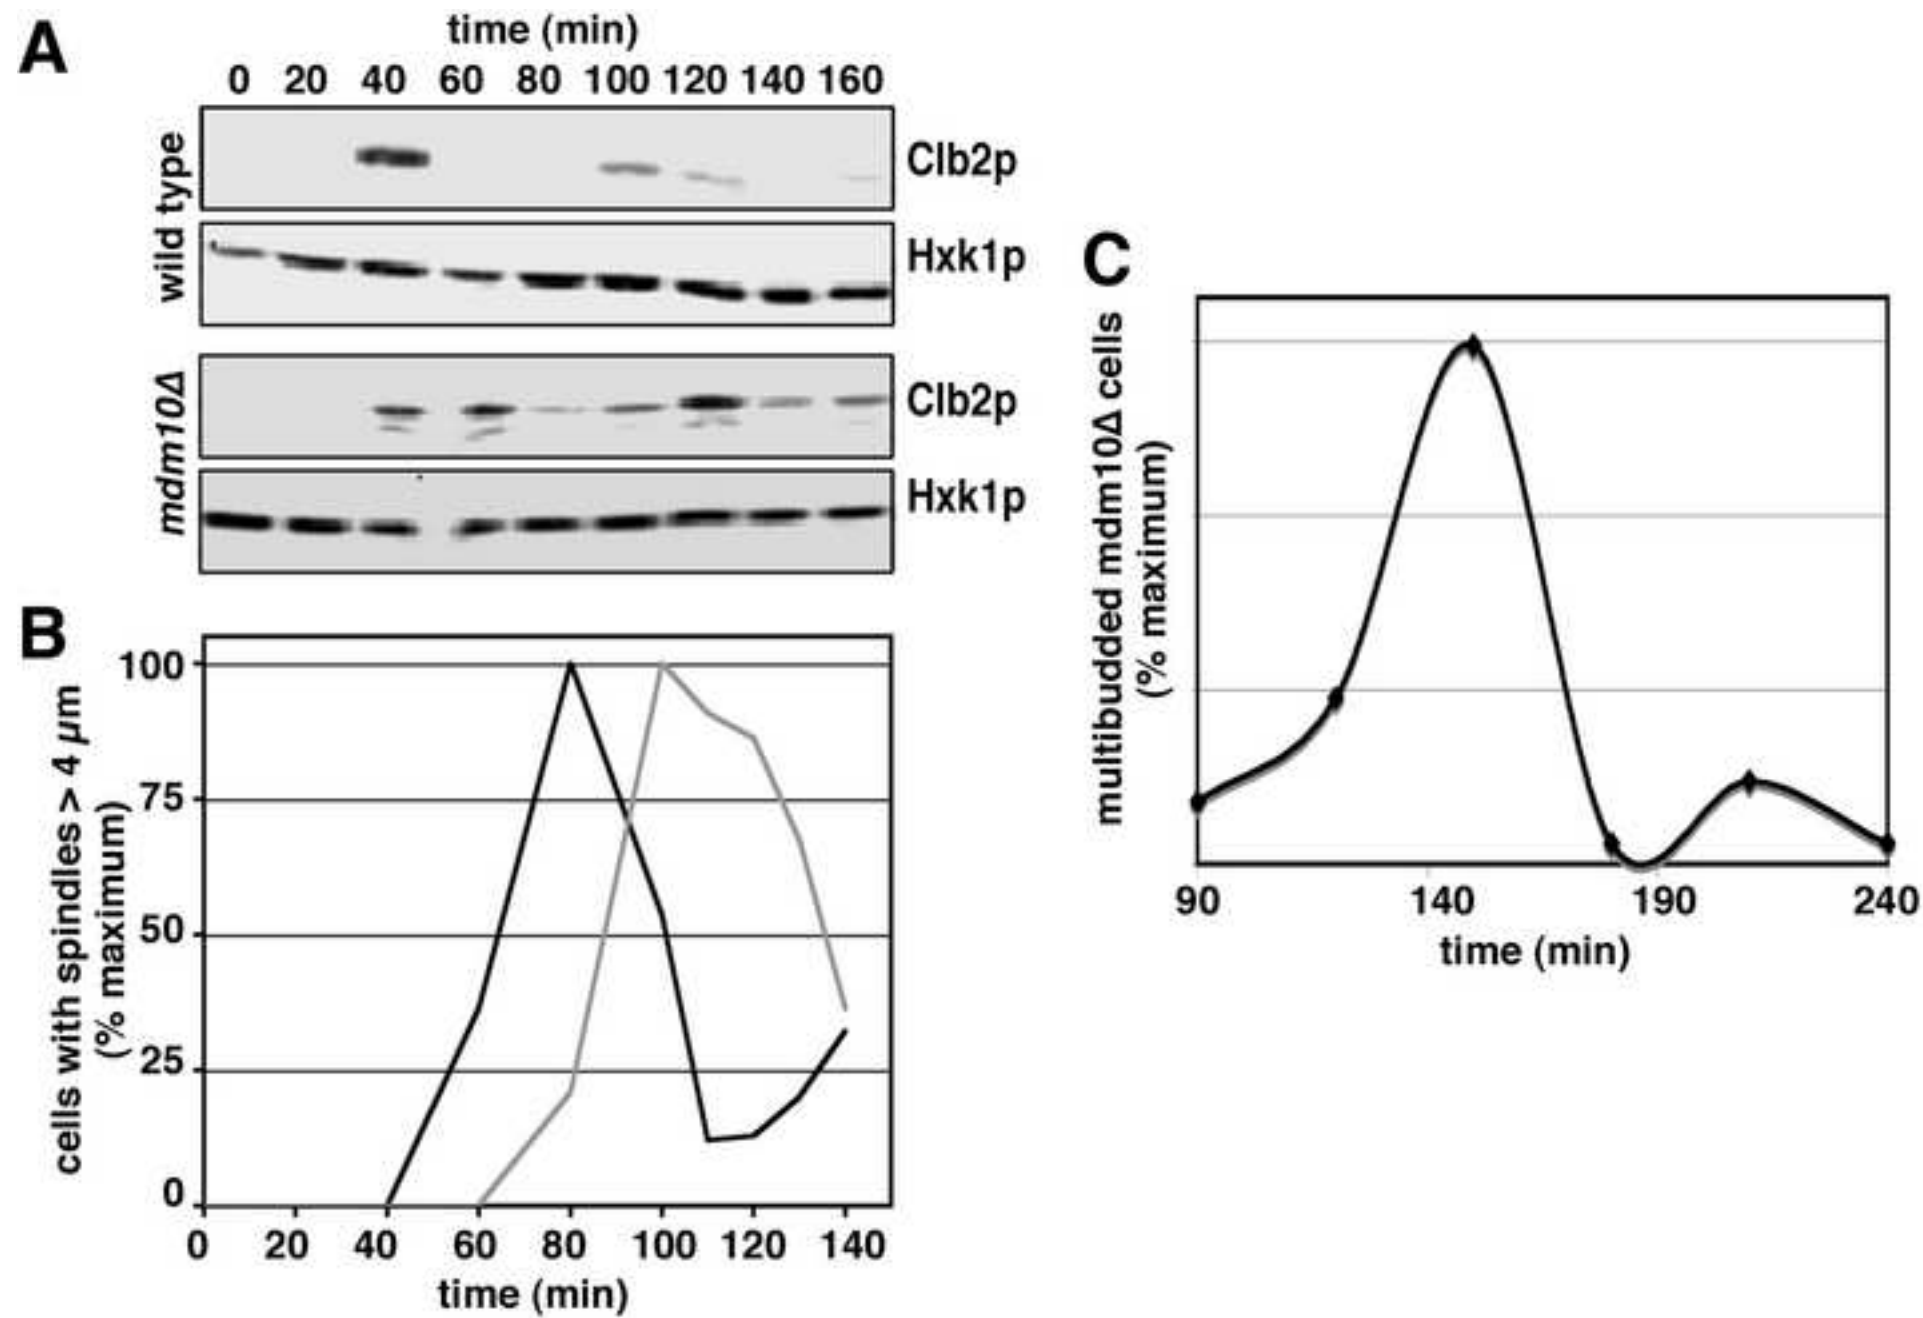

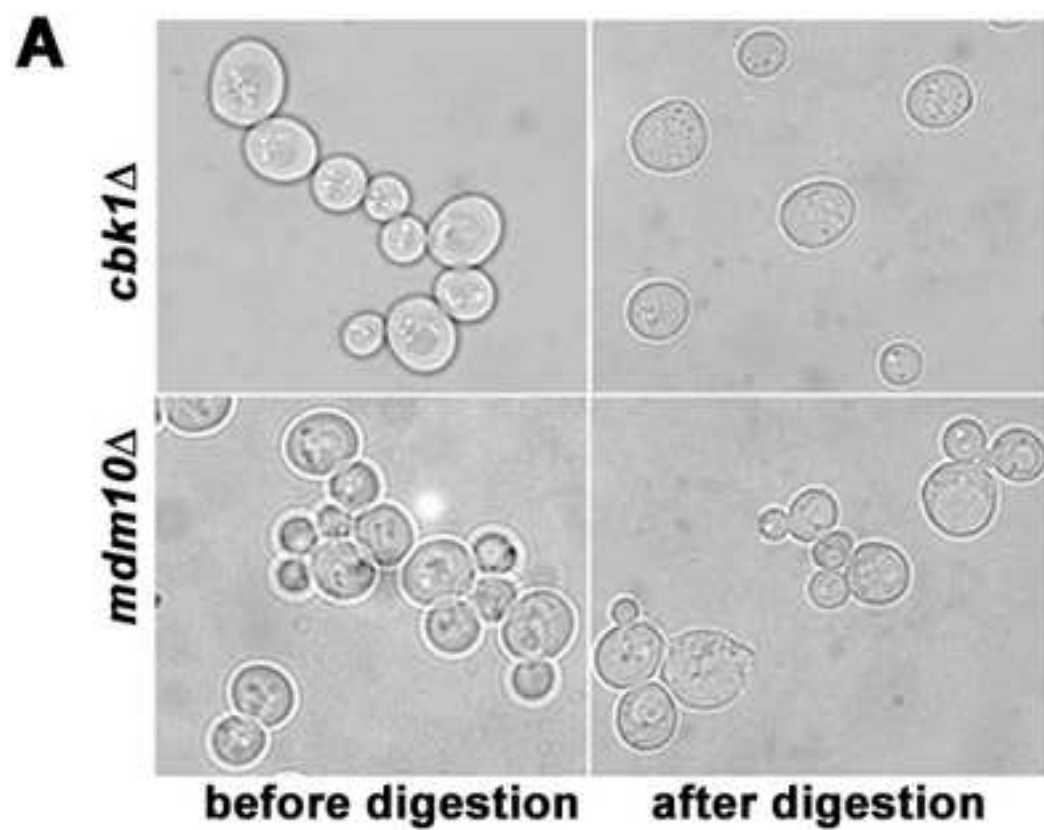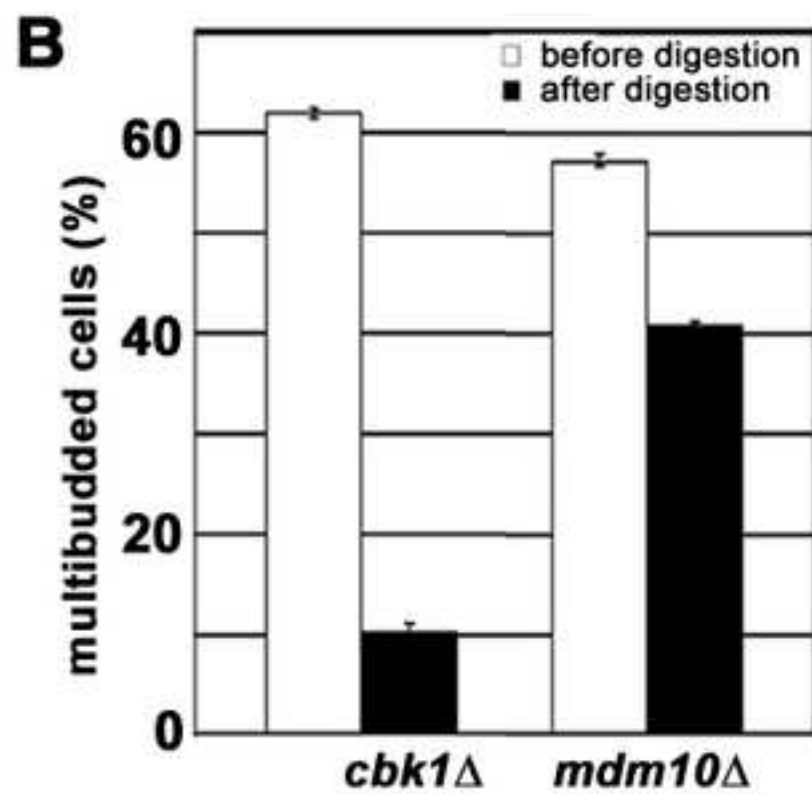

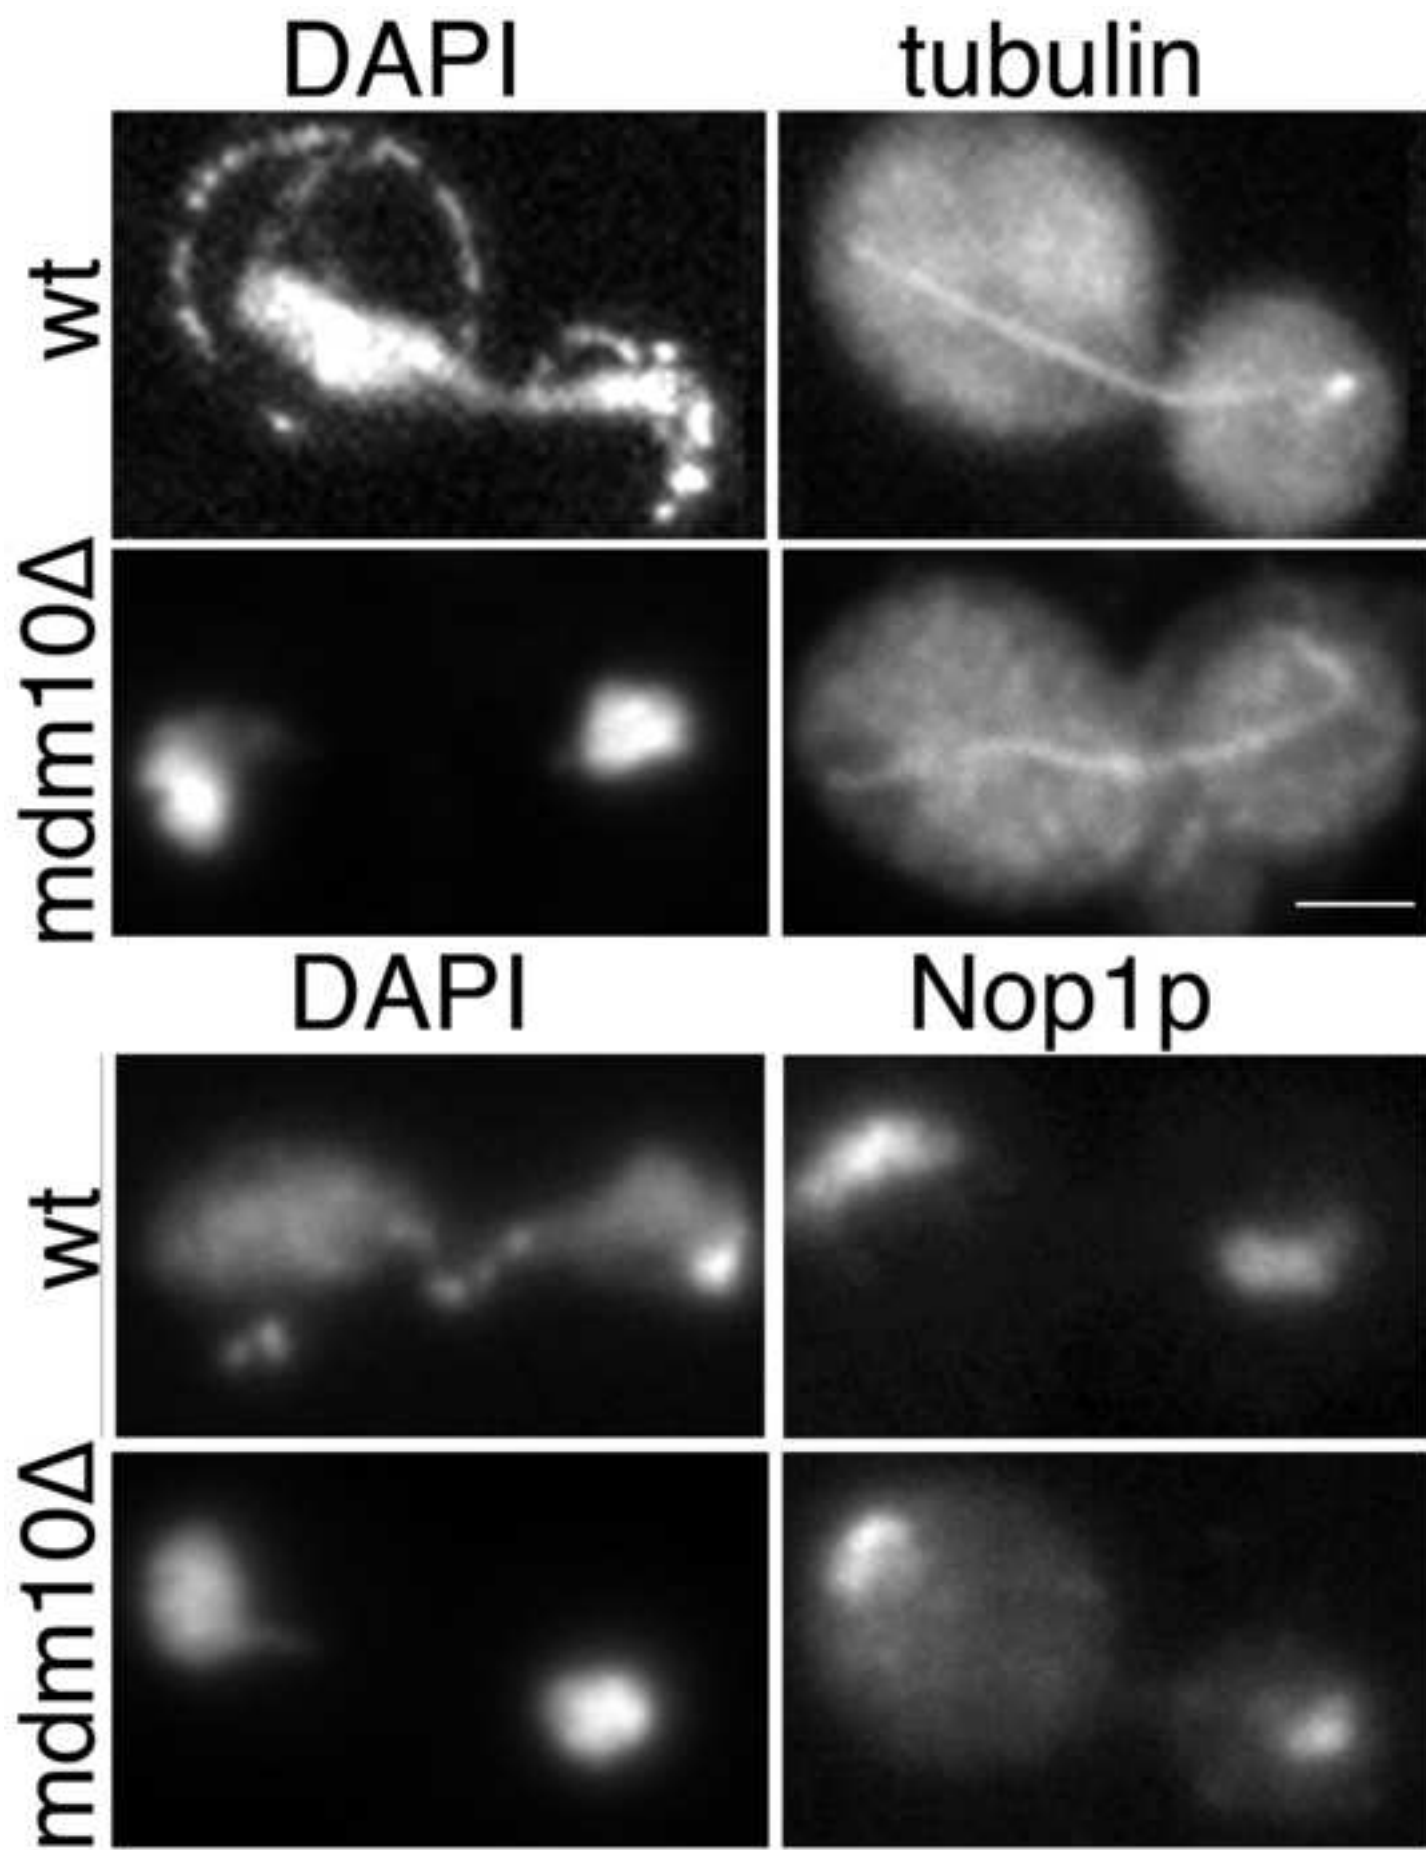

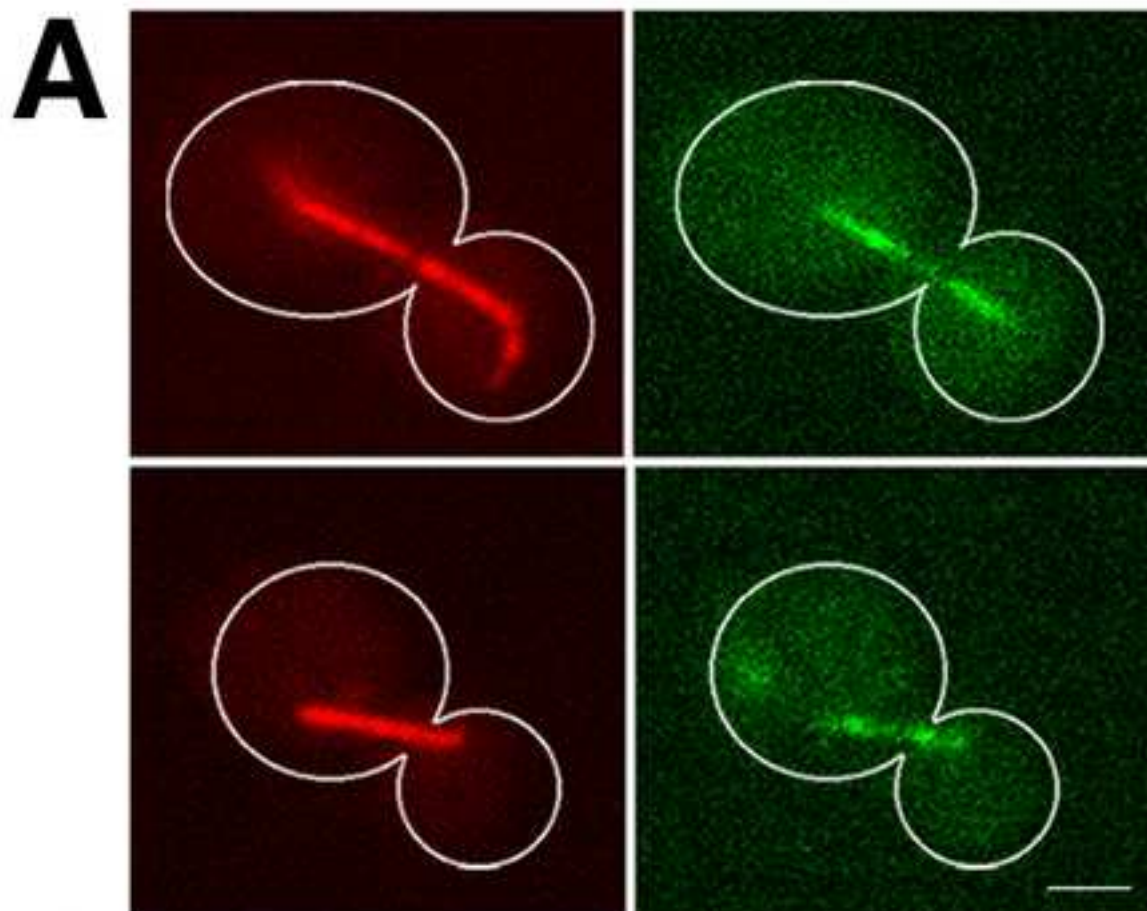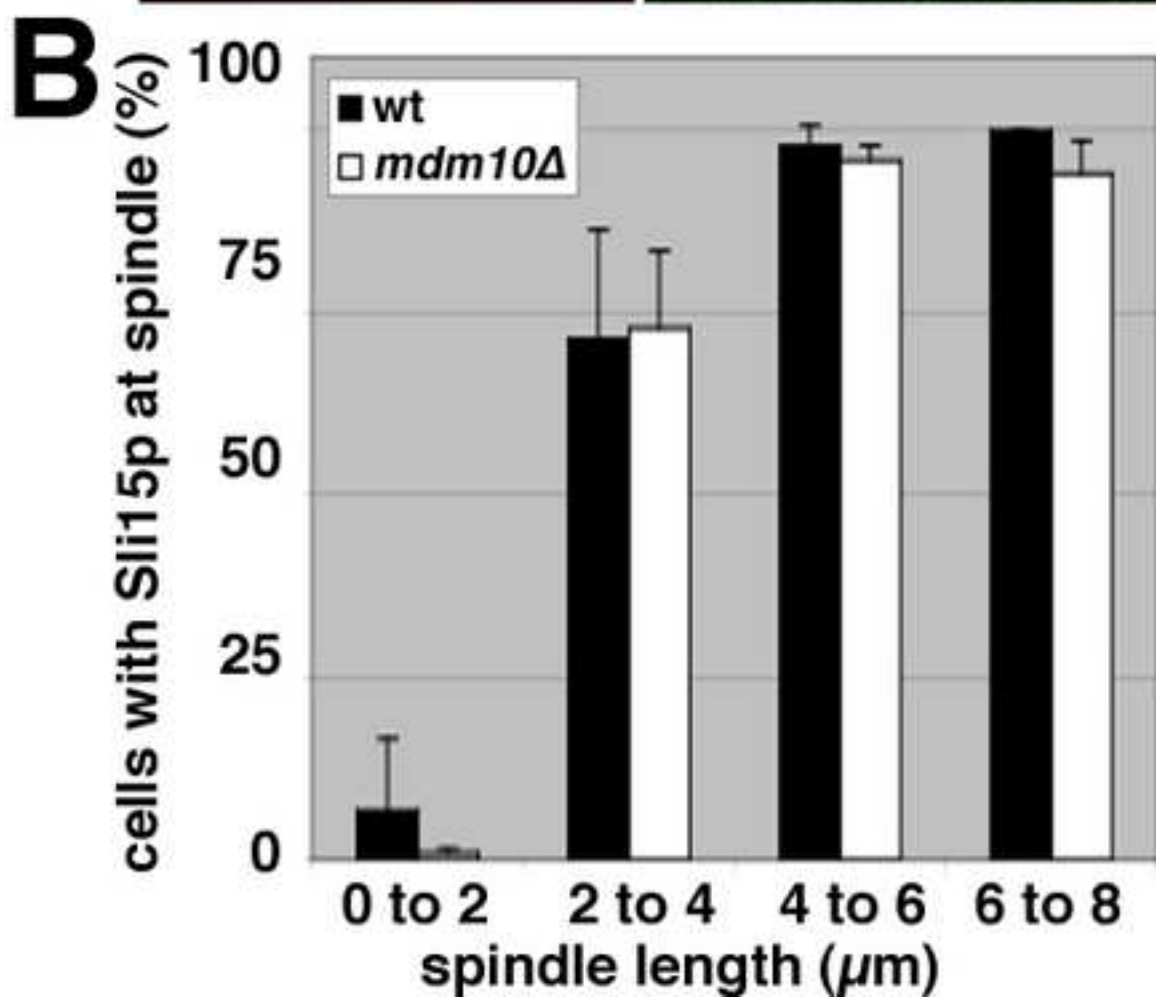

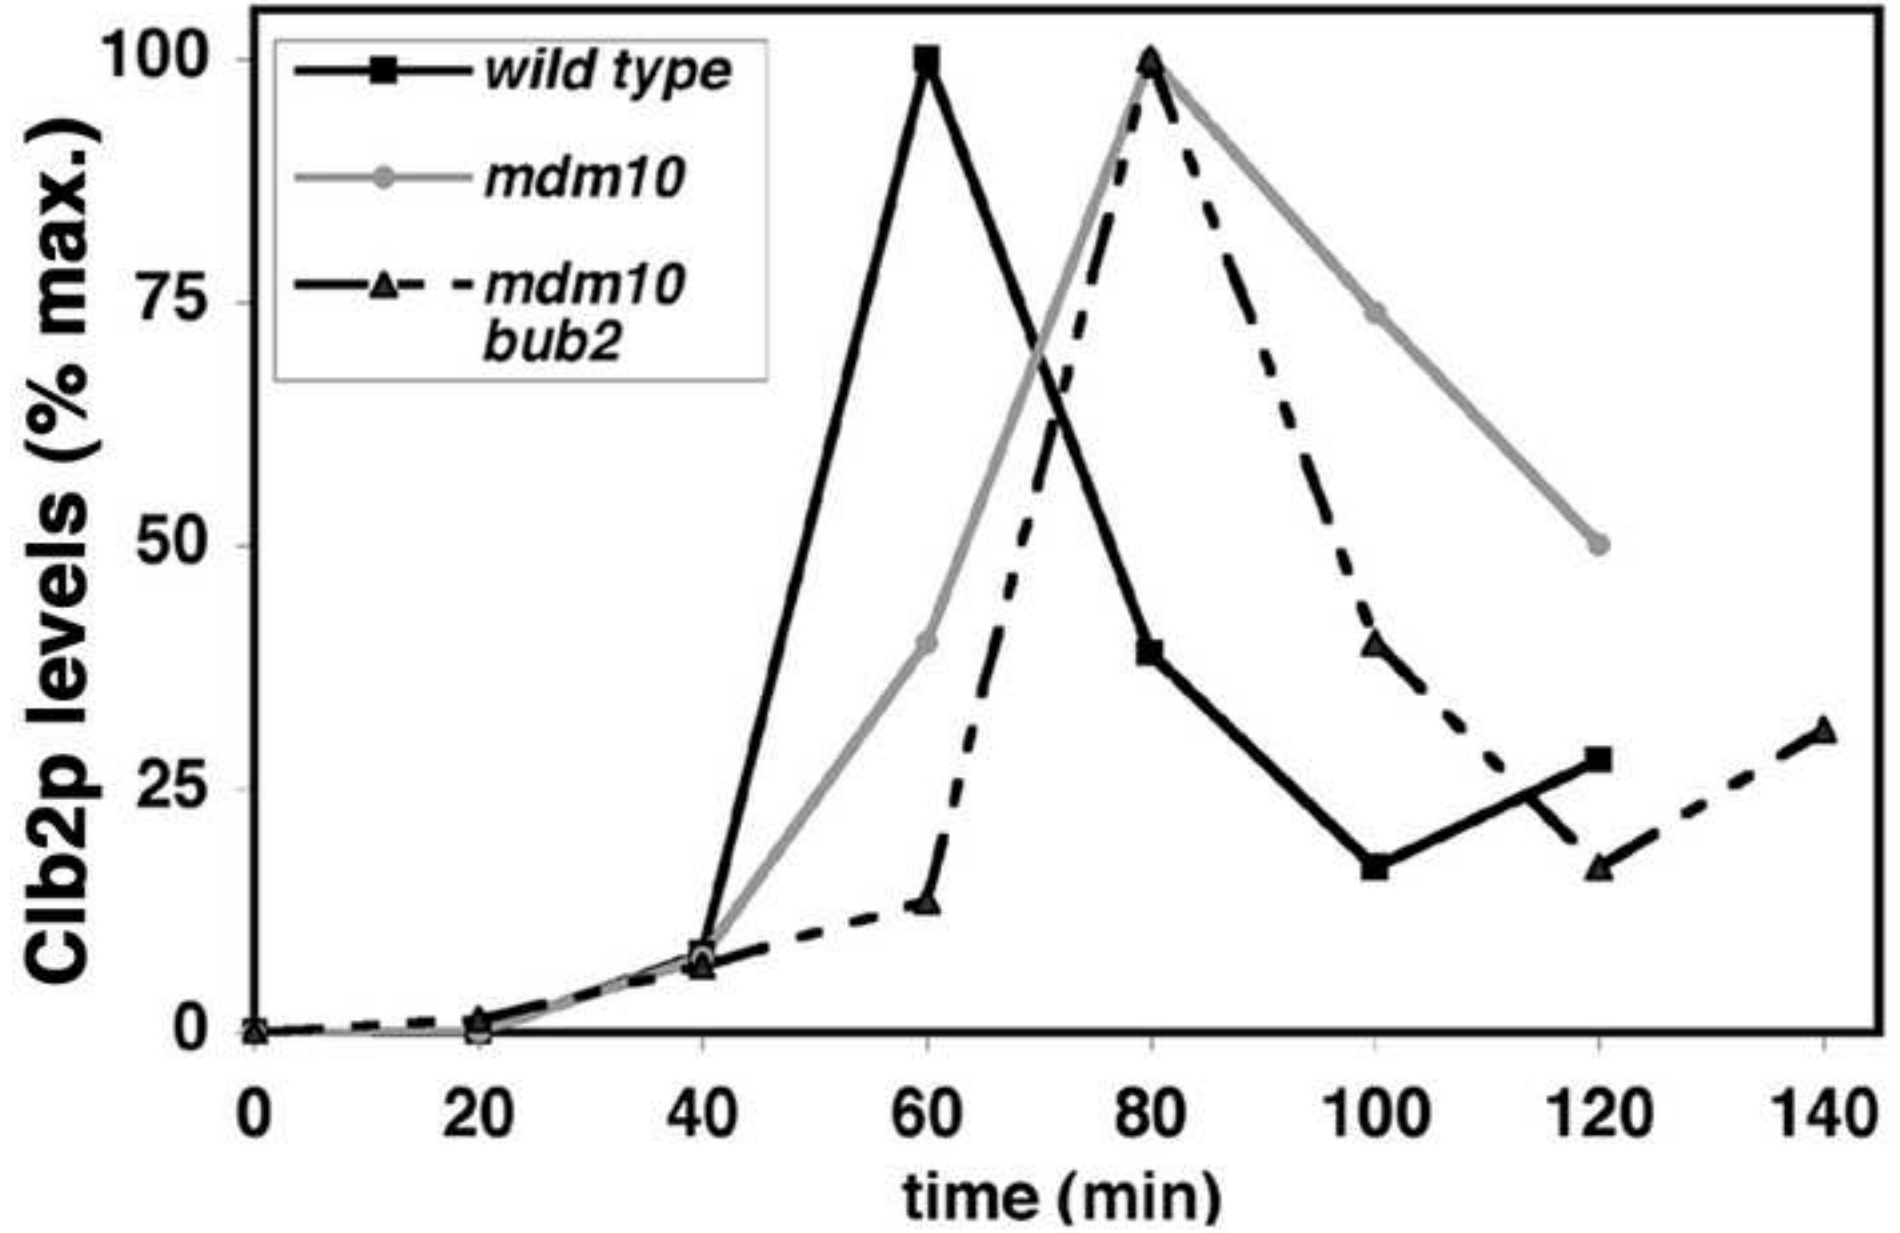

Supplement: NIHMS142776-supplement-01.pdf [file NIHMS142776-supplement-01.pdf]
